# Supplementary material for: Pan-cancer predictions of transcription factors mediating aberrant DNA methylation
Source: PubMed Central journal article supplement (PMC8944071; doi:10.1186/s13072-022-00443-w), 2022-03-24
Supplement: 13072_2022_443_MOESM1_ESM.pdf [file 13072_2022_443_MOESM1_ESM.pdf]

**Additional file 1: Supplementary Tables S1-S5 and Figures S1-S6.**

**Supplementary Tables**

**Table S1: Number of HM450 TCGA samples used**

**Table S2: WGBS sequencing data**

**Table S3: DMRs from WGBS data**

**Table S4: CHIP-seq sequencing data**

**Table S5: List of oligonucleotides used in this study**

**Supplementary Figures**

**Figure S1: TF motif enrichment in CpG-poor DMRs.**

**Figure S2: TF motif enrichment in CpG-rich DMRs.**

**Figure S3: Distribution of DNA methylation in the WGBS samples.**

**Figure S4: FOXA1 and GATA3 binding in HCC1954 breast cancer cells.**

**Figure S5: Characterization of knock-out cells.**

**Table S1: Number of HM450 TCGA samples used**

| Cancer type | Healthy samples | Cancer samples |
|-------------|-----------------|----------------|
| BLCA        | 19              | 400            |
| BRCA        | 80              | 729            |
| CHOL        | 9               | 36             |
| COAD        | 27              | 246            |
| HNSC        | 47              | 483            |
| KIRC        | 115             | 252            |
| KIRP        | 44              | 269            |
| LIHC        | 46              | 357            |
| LUAD        | 22              | 437            |
| LUSC        | 39              | 361            |
| PRAD        | 44              | 448            |
| THCA        | 52              | 477            |
| UCEC        | 32              | 416            |

**Table S2: WGBS sequencing data**

| Sample                 | Number raw reads | Percent mapped reads | Percent duplicates removed | Number reads kept | Percent CpG methylation | Mean CpG coverage |
|------------------------|------------------|----------------------|----------------------------|-------------------|-------------------------|-------------------|
| WGBS_HME1_1            | 384,099,764      | 83.6%                | 8.5%                       | 293,133,461       | 63.8%                   | 16                |
| WGBS_HCC1954_1         | 382,607,416      | 82.0%                | 25.0%                      | 235,014,068       | 63.5%                   | 12                |
| WGBS_HCC1954-FOXA1WT_1 | 445,782,573      | 81.5%                | 31.0%                      | 250,622,961       | 61.5%                   | 12                |
| WGBS_HCC1954-FOXA1KO_1 | 419,521,228      | 79.0%                | 31.0%                      | 228,549,121       | 64.0%                   | 11                |
| WGBS_HCC1954-FOXA1KO_2 | 414,620,779      | 77.5%                | 31.6%                      | 219,883,848       | 64.2%                   | 10                |
| WGBS_HCC1954-GATA3WT_1 | 431,439,156      | 77.6%                | 35.5%                      | 215,281,513       | 61.1%                   | 10                |
| WGBS_HCC1954-GATA3KO_1 | 447,986,618      | 77.2%                | 32.5%                      | 233,841,837       | 64.0%                   | 11                |
| WGBS_HCC1954-GATA3KO_2 | 483,415,210      | 77.2%                | 32.2%                      | 252,737,791       | 65.4%                   | 12                |

**Table S3: DMRs from WGBS data**

| Sample 1                                         | Sample 2                                 | Number hypo-methylated DMRs | Number hyper-methylated DMRs |
|--------------------------------------------------|------------------------------------------|-----------------------------|------------------------------|
| WGBS_HCC1954_1                                   | WGBS_HME1_1                              | 145,826                     | 121,090                      |
| WGBS_HCC1954-FOXA1KO_1<br>WGBS_HCC1954-FOXA1KO_2 | WGBS_HCC1954_1<br>WGBS_HCC1954-FOXA1WT_1 | 2578                        | 5969                         |
| WGBS_HCC1954-GATA3KO_1<br>WGBS_HCC1954-GATA3KO_2 | WGBS_HCC1954_1<br>WGBS_HCC1954-GATA3WT_1 | 1449                        | 14529                        |

**Table S4: CHIP-seq sequencing data**

| Sample          | Number raw reads | Number mapped reads | Percent reads kept | Number peaks | Number merged peaks |
|-----------------|------------------|---------------------|--------------------|--------------|---------------------|
| FOXA1_HCC1954_1 | 53,636,539       | 46,336,051          | 86.4%              | 13,753       | 16,323              |
| FOXA1_HCC1954_2 | 57,623,146       | 49,609,912          | 86.1%              | 14,257       |                     |
| GATA3_HCC1954_1 | 55,988,365       | 48,262,991          | 86.2%              | 2,095        | 3,949               |
| GATA3_HCC1954_2 | 57,303,298       | 49,282,203          | 86.0%              | 3,751        |                     |
| input_HCC1954_1 | 55,828,314       | 32,817,068          | 58.8%              | -            | -                   |

**Table S5: List of oligonucleotides used in this study**

| Gene/chromosome | Sense   | Sequence                               | Use                      |
|-----------------|---------|----------------------------------------|--------------------------|
| FOXA1           | Forward | AGGGCTGGATGGTTGTATTG                   | qPCR                     |
| FOXA1           | Reverse | GTGTCTGCGTAGTAGCTGTTG                  | qPCR                     |
| GATA3           | Forward | CCAGACCAGAAACCGAAAAA                   | qPCR                     |
| GATA3           | Reverse | CCAGACCAGAAACCGAAAAA                   | qPCR                     |
| RPL13A          | Forward | CCGAGAAGAACGTGGAGAAG                   | qPCR (housekeeping gene) |
| RPL13A          | Reverse | GGCAACGCATGAGGAATTA                    | qPCR (housekeeping gene) |
| FOXA1           | Forward | CACCGGTAGTAGCTGTTCCAGTCGC              | CRISPR/Cas9 (sgRNA)      |
| FOXA1           | Reverse | AAACGCGACTGGAACAGCTACTACC              | CRISPR/Cas9 (sgRNA)      |
| GATA3           | Forward | CACCGGGACTTGCATCCGAAGCCGG              | CRISPR/Cas9 (sgRNA)      |
| GATA3           | Reverse | AAACCCGGCTTCGGATGCAAGTCCC              | CRISPR/Cas9 (sgRNA)      |
| GATA3           | Forward | TAAGCAGAATTCATGGAGGTGACGGCGGACCAGCCG   | Cloning                  |
| GATA3           | Reverse | TGCTTAGAATTCCTAACCCATGGCGGTGACCATGCTGG | Cloning                  |
| chr4            | Forward | AGGAATCTCGCGAGTGTTGA                   | ChIP-qPCR (RC1)          |
| chr4            | Reverse | GAGAGACTGAGGCTGGGAAA                   | ChIP-qPCR (RC1)          |
| chr1            | Forward | ATCTGGTCCACAATGTCCGGT                  | ChIP-qPCR (RC2)          |
| chr1            | Reverse | TCCCCAAGAAGCAGAACCT                    | ChIP-qPCR (RC2)          |
| chr1            | Forward | TTGACAAGCCTGCCACTTAC                   | ChIP-qPCR (ROI1)         |
| chr1            | Reverse | CATTGAATGGGCTCTCGGTG                   | ChIP-qPCR (ROI1)         |
| chr8            | Forward | CAGCCTTCTGGATTCTGC                     | ChIP-qPCR (ROI2)         |
| chr8            | Reverse | CTAGGAGCAGCTCGAGAAGG                   | ChIP-qPCR (ROI2)         |
| chr10           | Forward | GGAAAGAGGCTGCCAATGAG                   | ChIP-qPCR (NC1)          |
| chr10           | Reverse | TTTGGGATCATTGGTCTGCC                   | ChIP-qPCR (NC1)          |
| chr9            | Forward | GACCATGTCCAGGCAAAAGT                   | ChIP-qPCR (NC2)          |
| chr9            | Reverse | AGGCTCCTACAGACGTGGAA                   | ChIP-qPCR (NC2)          |

Figure S1

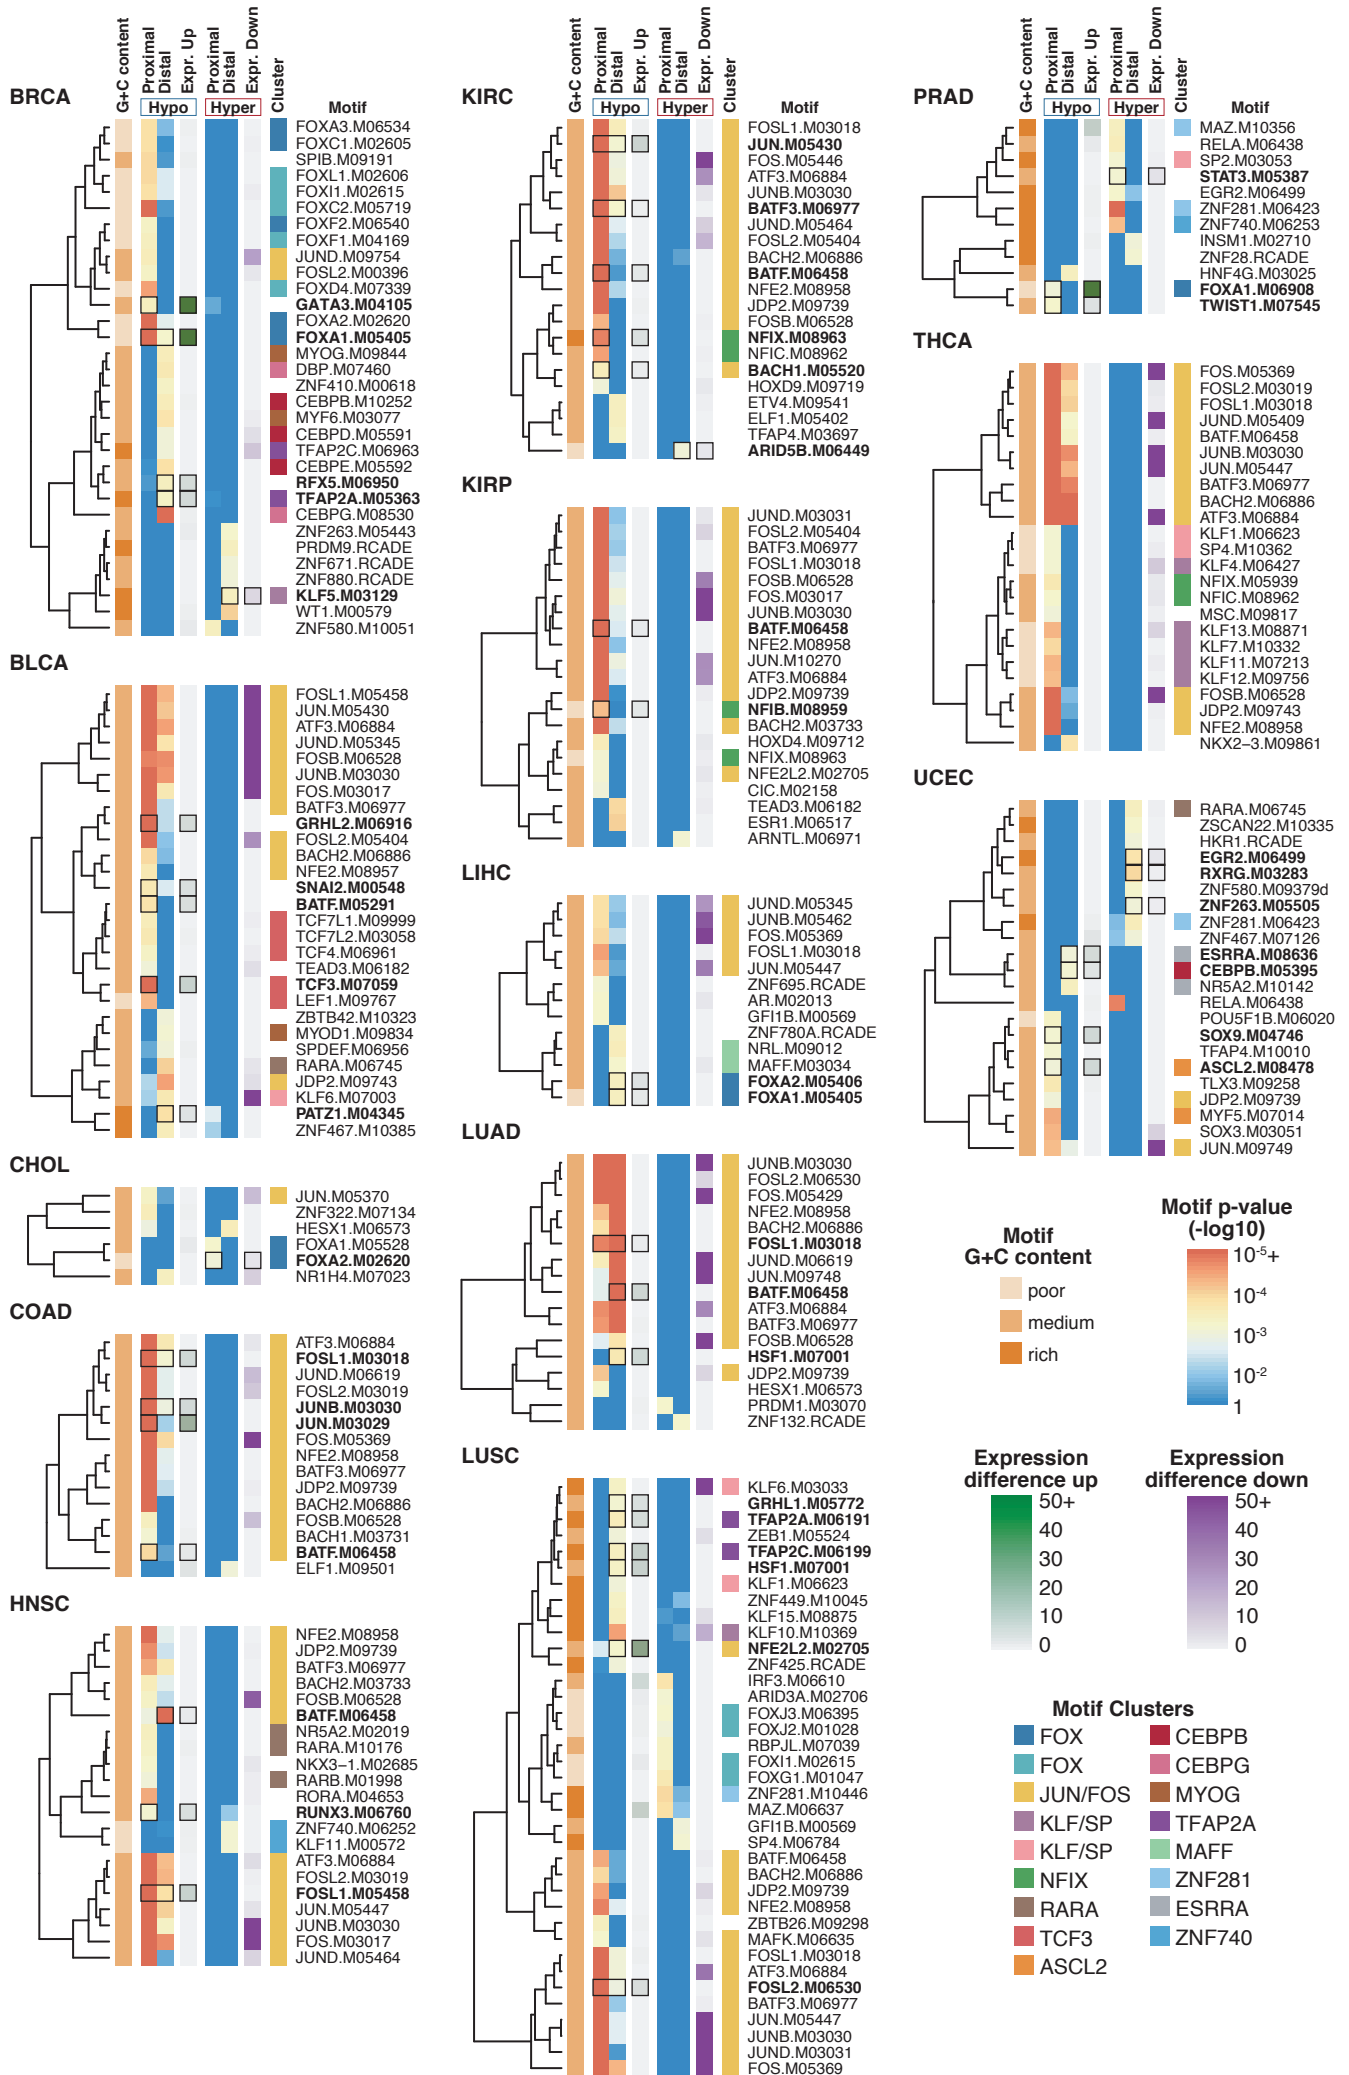

**Figure S1: TF motif enrichment in CpG-poor DMRs.** Pan cancer motif enrichment for all cancer types for all categories of CpG-poor DMRs. Each heatmap shows for one cancer type the best enriched motifs compared to control regions using a p-value threshold of  $10^{-3}$  and selecting one motif per TF using the p-value sum across all categories. TF expression heatmap is shown for corresponding TF expression using either positive (up) or negative (down) mean FPKM difference between cancer and healthy samples. Motif cluster and CpG content are shown. Motifs in highlighted in bold with black squares have matching motif expression and TF up- or down-regulation.

Figure S2

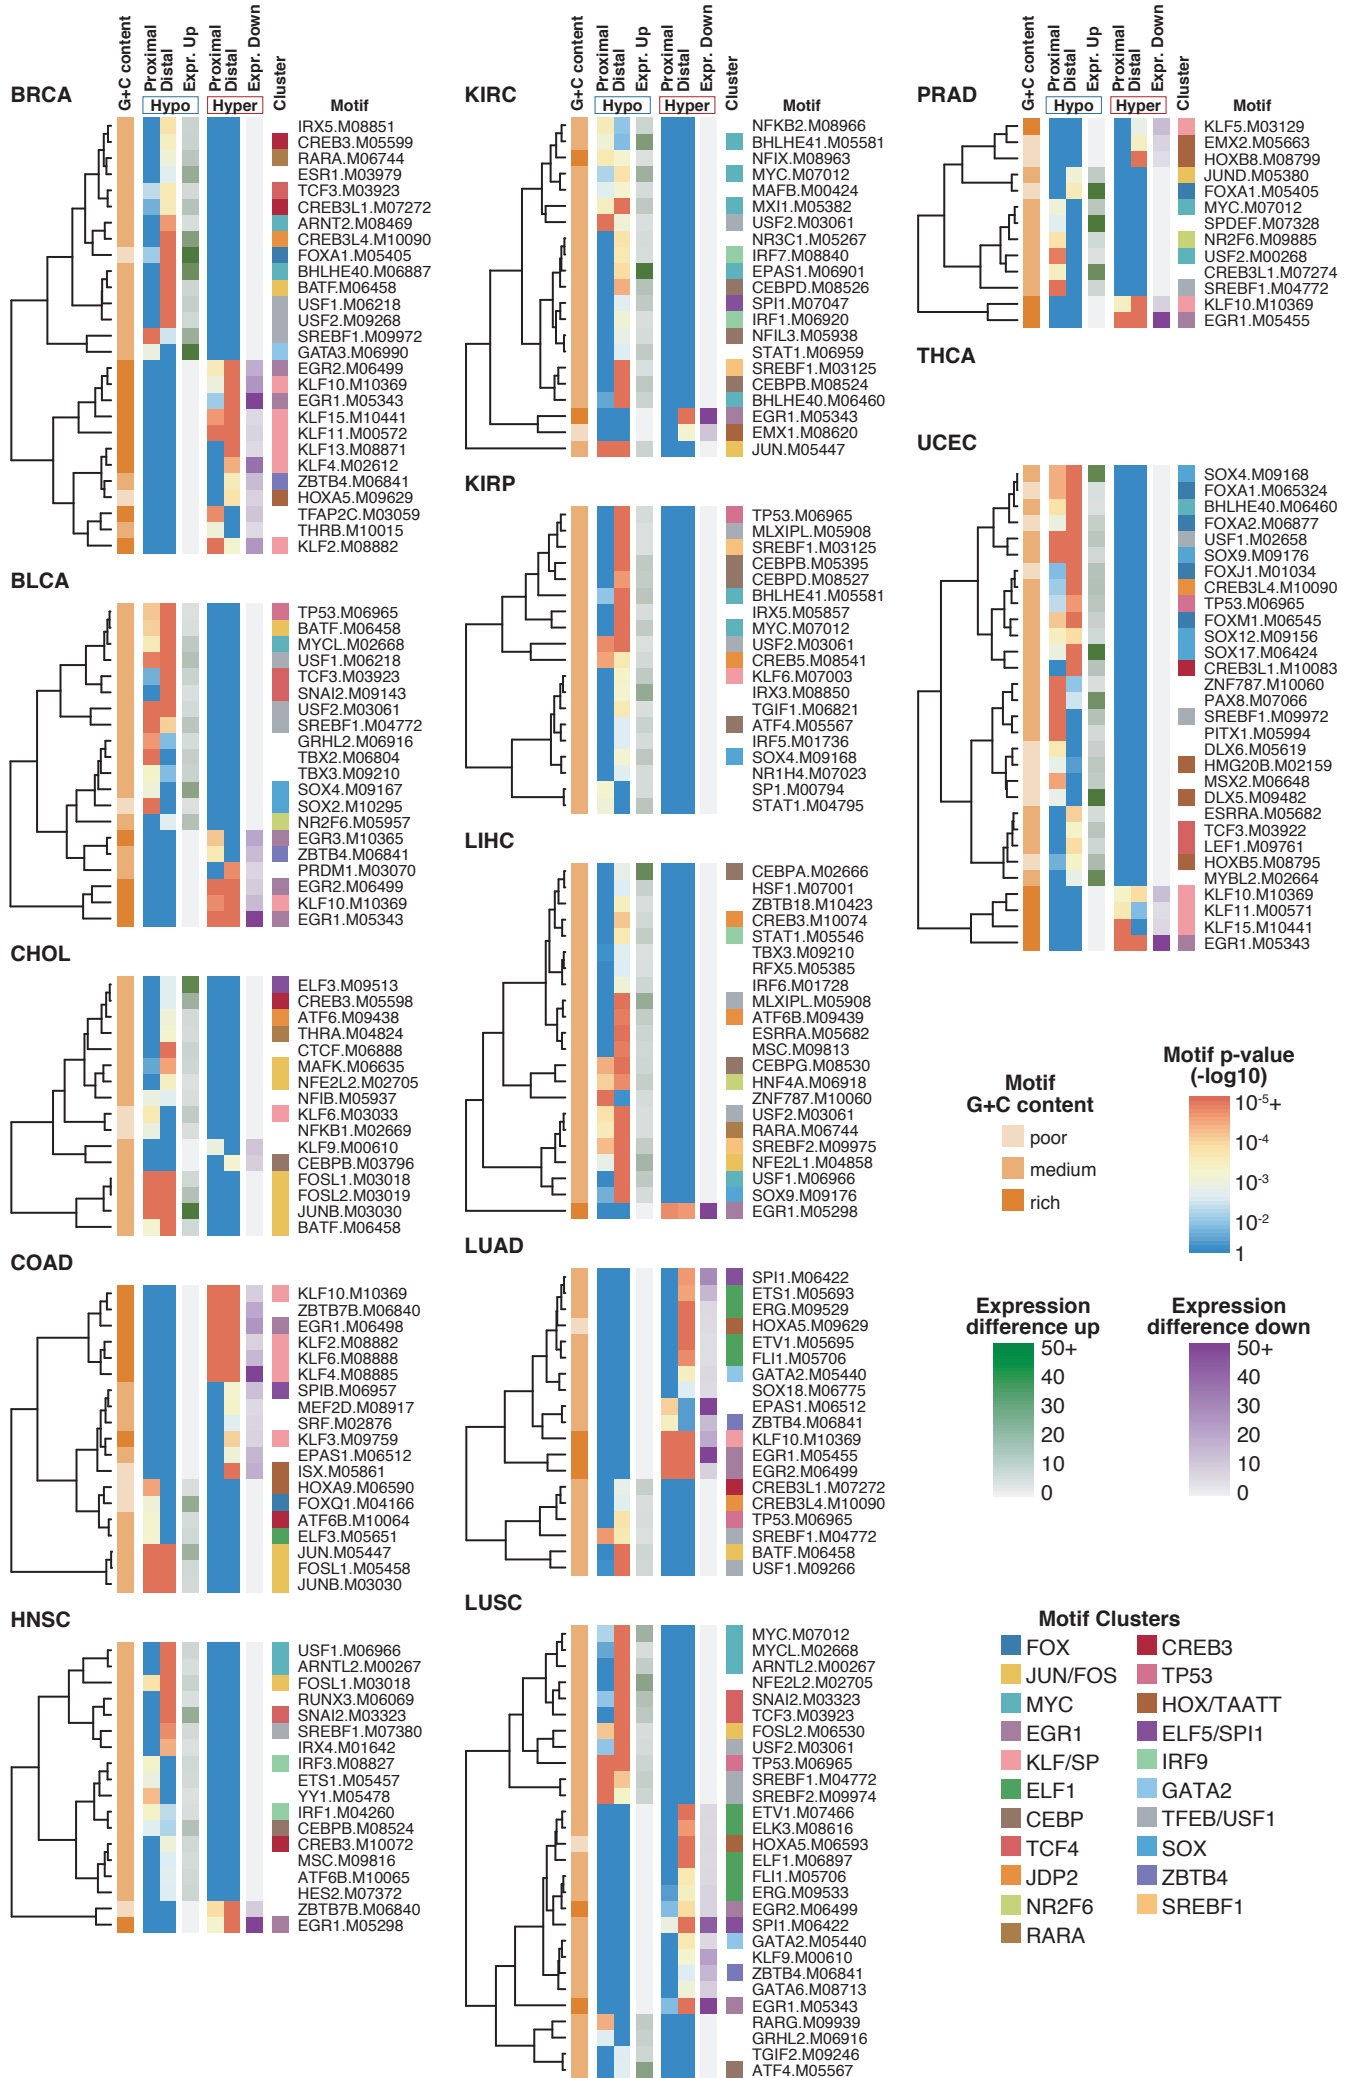

**Figure S2: TF motif enrichment in CpG-rich DMRs.** Pan cancer motif enrichment for all cancer types for all categories of CpG-rich DMRs. Each heatmap shows for one cancer type the best enriched motifs in hypo- compared to hyper- methylated regions using a p-value threshold of  $10^{-3}$  and selecting one motif per TF using the p-value sum across all categories. TF expression heatmap is shown for corresponding TF expression using either positive (up) or negative (down) mean FPKM difference between cancer and healthy samples. Only motifs that have matching motif expression and TF up- or down-regulation are shown. Motif cluster and CpG content are shown.

**Figure S3**

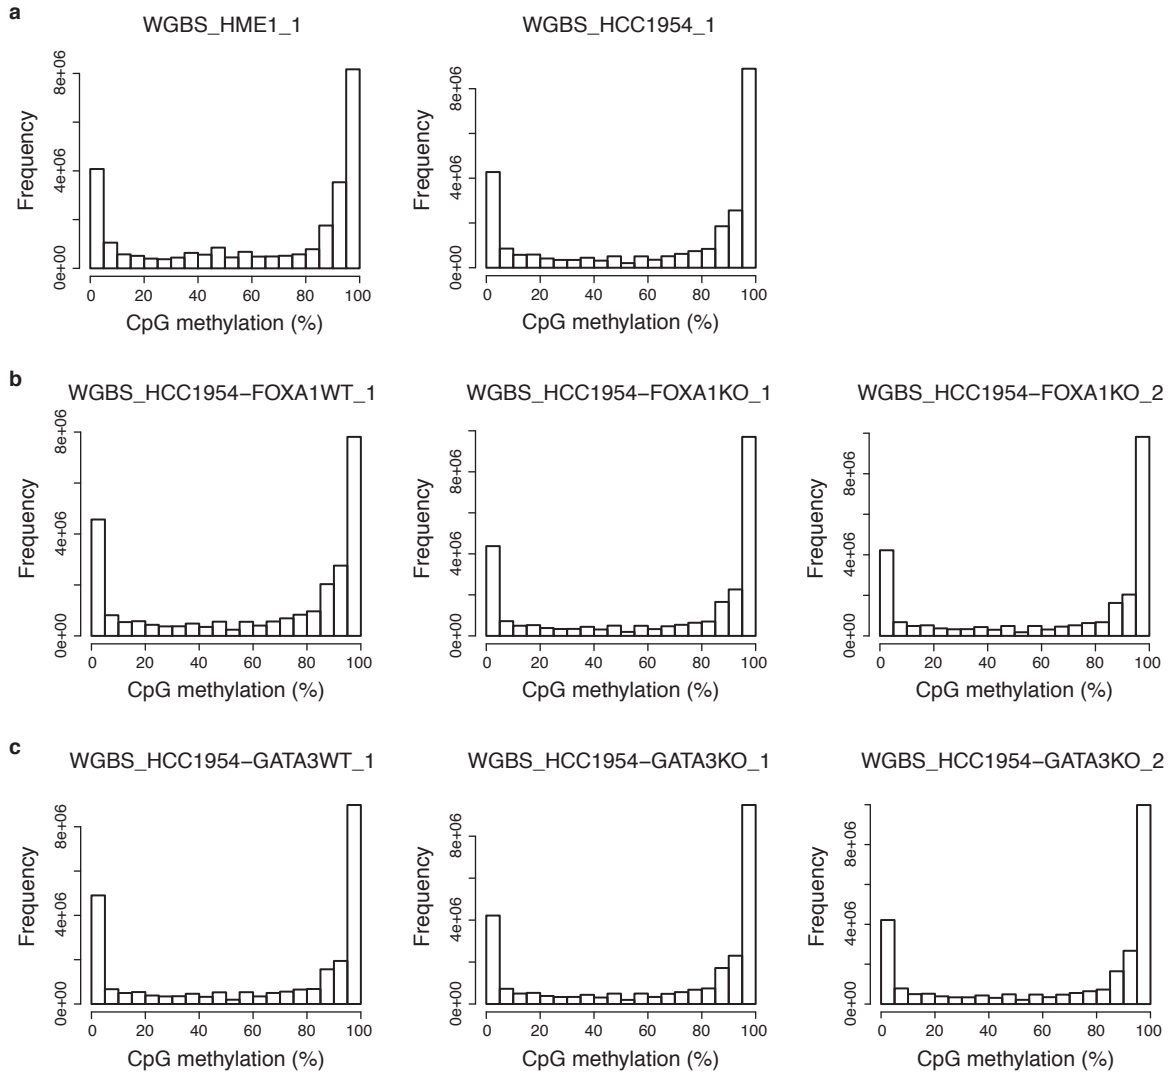

**Figure S3: Distribution of DNA methylation in the WGBS samples. a,b,c.** Histograms of the methylation level of all CpGs for each sample.



**Figure S4**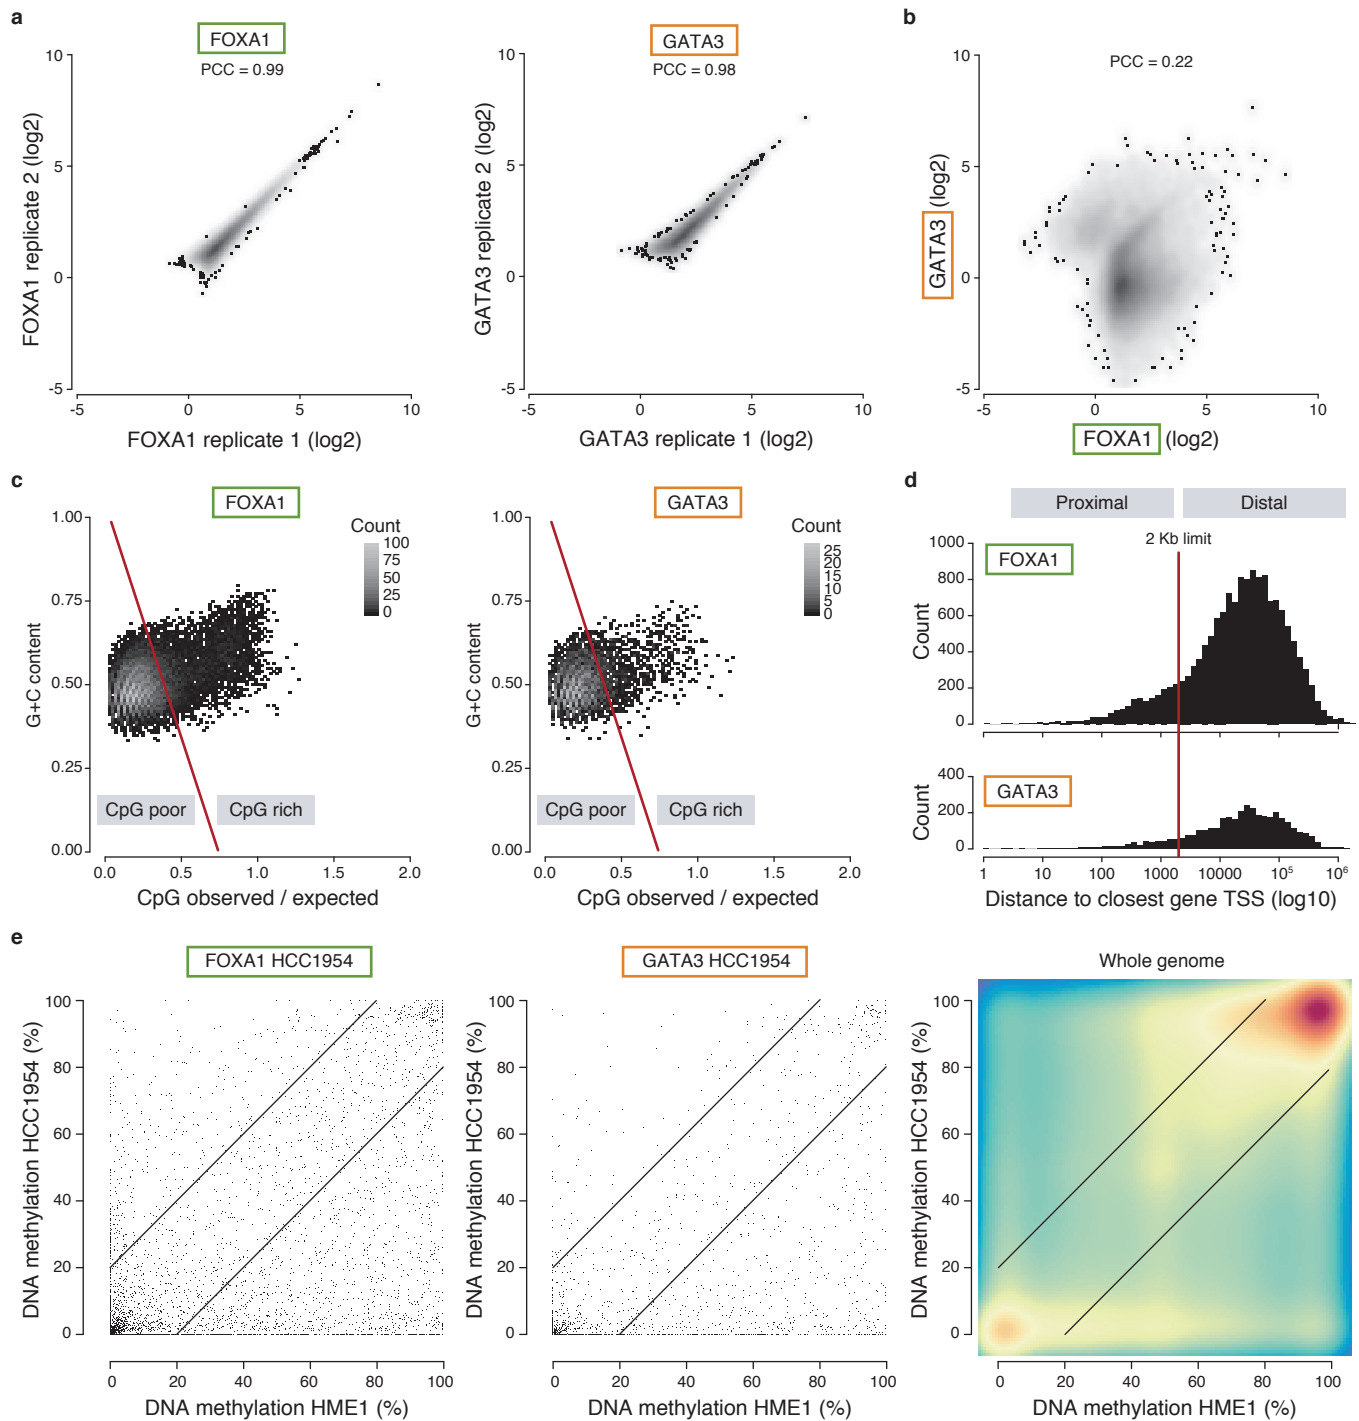

**Figure S4: FOXA1 and GATA3 binding in HCC1954 breast cancer cells.** **a.** Correlation of ChIP-seq signal and Pearson Correlation Coefficient (PCC) of FOXA1 or GATA3 replicates at FOXA1 and GATA3 peaks respectively (FOXA1  $n=16,323$ ; GATA3  $n=3,949$ ). **b.** Correlation of ChIP-seq signal and Pearson Correlation Coefficient (PCC) of FOXA1 and GATA3 samples at merged FOXA1 and GATA3 peak regions ( $n=18,270$ ). **c.** CpG and G+C content of FOXA1 and GATA3 peaks. Two categories, CpG-poor and CpG-rich, were defined according to a threshold following  $y = -1.4(x - 0.38) + 0.51$  (FOXA1  $n=16,323$ ; GATA3  $n=3,949$ ). **d.** Distance of FOXA1 and GATA3 peaks to their closest gene TSS. Two categories, proximal and distal, were defined according to a 2 kilobase (Kb) threshold (FOXA1  $n=16,323$ ; GATA3  $n=3,949$ ). **e.** Scatterplots of mean DNA methylation in HCC1954 and hTERT-HME1 cells in 200 bp windows around FOXA1 or GATA3 HCC1954 peak summits that contain at least 2 CpGs and overlapping a matching FOXA1 or GATA3 motif (FOXA1  $n=4,709$ ; GATA3  $n=1,671$ ) or in all 200 bp consecutive windows along the hg38 genome containing at least 2 CpGs ( $n=5,867,466$ ). Density of points increases from blue to dark red.

**Figure S5**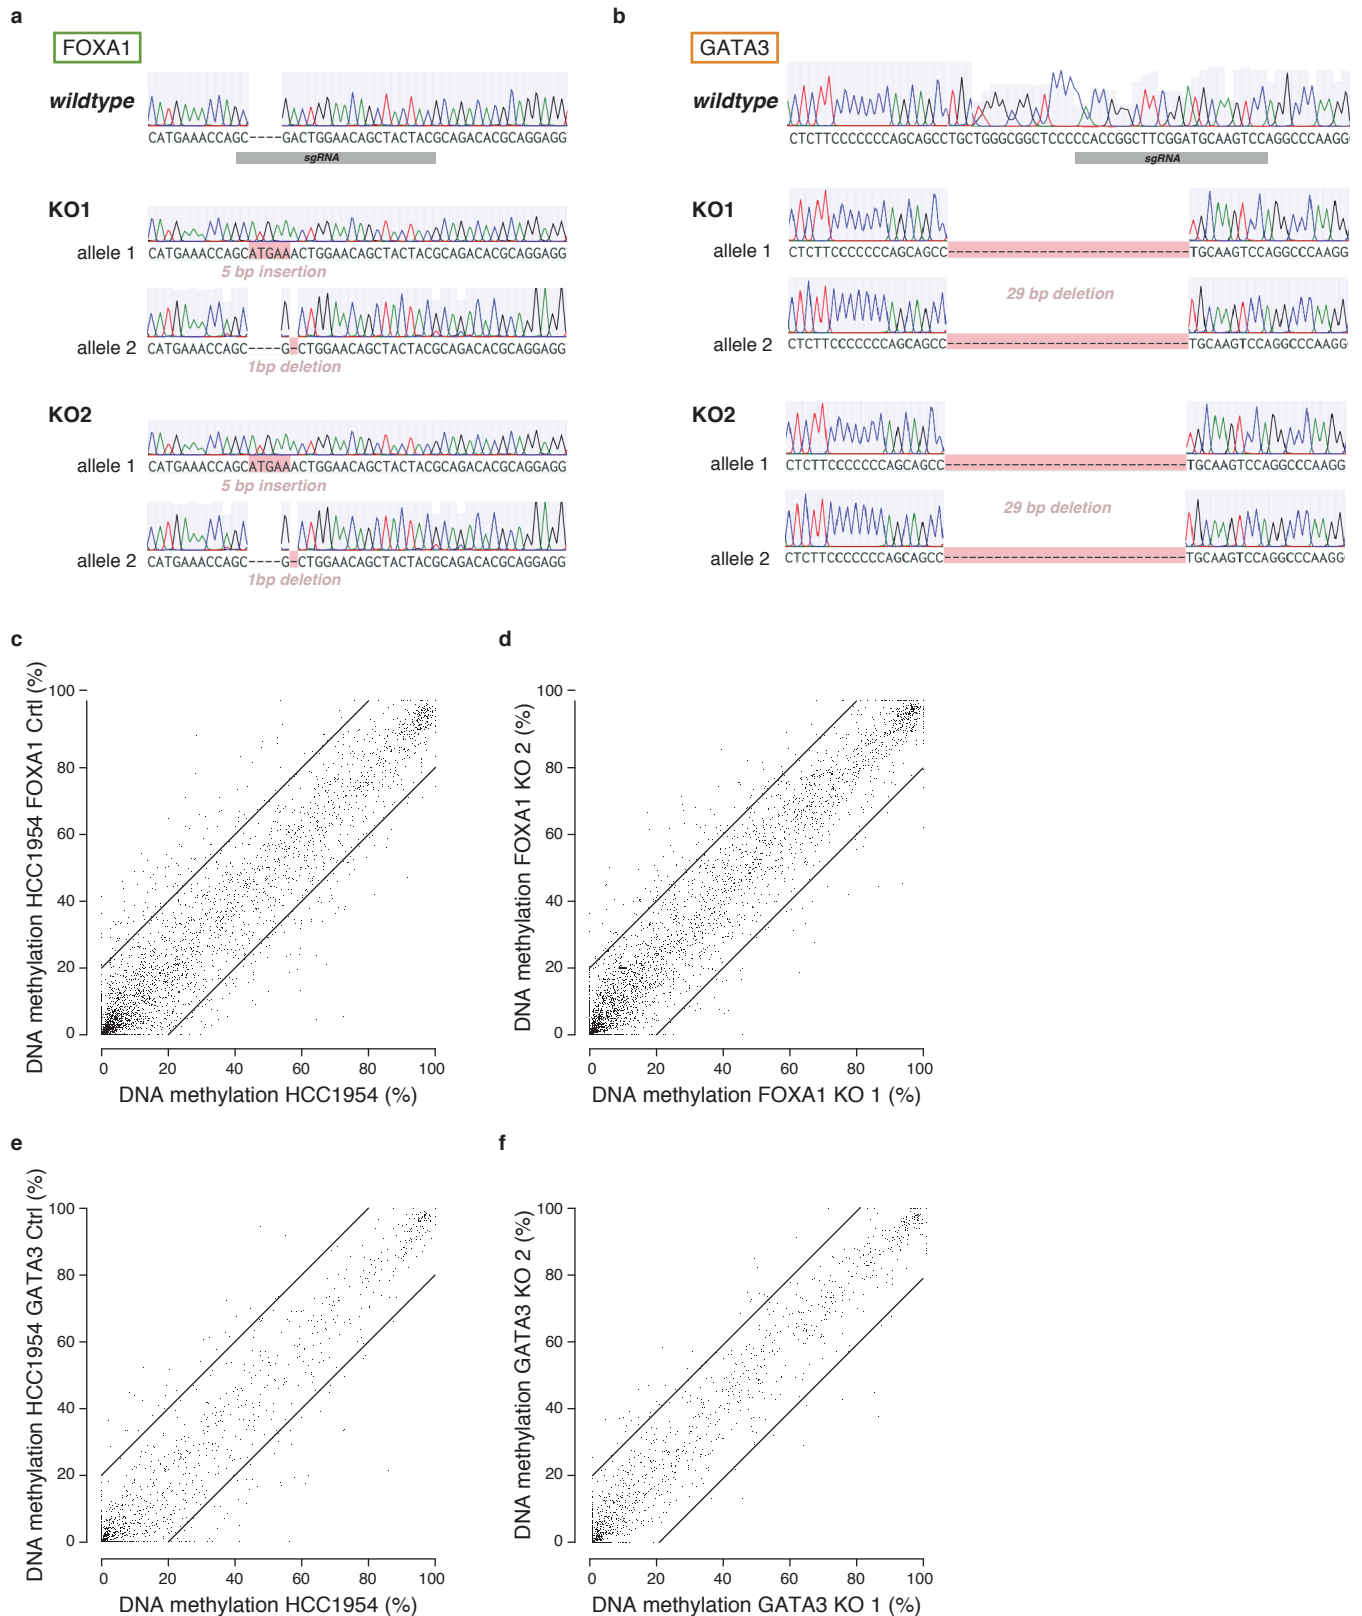

**Figure S5: Characterization of knockout cells.** **a,b.** Sequencing chromatographs of mutant and wildtype alleles for FOXA1 in **a.** and GATA3 in **b.** around the sequence targeted by the guide RNA (in grey). Pink highlighting delineates the area of CRISPR-induced insertion/deletion. **c.** DNA methylation levels in WT HCC1954 and HCC1954 FOXA1 KO control cells (mean across samples) in 200 bp windows around FOXA1 peak summits that contain at least 2 CpGs and overlapping a matching FOXA1 motif ( $n=4473$ ). **d.** DNA methylation levels in two replicates of HCC1954 FOXA1 KO cells as in **c.** **e.** DNA methylation levels in WT HCC1954 and HCC1954 GATA3 KO control cells as in **c.** and overlapping a matching GATA3 motif ( $n=1,598$ ). **f.** DNA methylation levels in two replicates of HCC1954 GATA3 KO cells as in **d.**
